# Supplementary material for: Synthesis of metallic mixed 3R and 2H Nb1+xS2 nanoflakes by chemical vapor deposition
Source: Royal Society of Chemistry journal article supplement (doi:10.1039/c9fd00132h), 2020-01-23
Supplement: c9fd00132h1.pdf [file c9fd00132h1.pdf]

## Supplementary Information

### Synthesis of Metallic Mixed 3R and 2H Nb<sub>1+x</sub>S<sub>2</sub> Nanoflakes by Chemical Vapor Deposition

Abdul Rahman Mohamad,<sup>\*a</sup> Azrul Azlan Hamzah,<sup>a</sup> Jieun Yang,<sup>b</sup> Yan Wang,<sup>b</sup> Ibrahim Bozkurt,<sup>c</sup> Hyeon Suk Shin,<sup>d</sup> Hu Young Jeong,<sup>e</sup> and Manish Chhowalla<sup>\*b</sup>

<sup>a</sup>Institute of Microengineering and Nanoelectronics, National University of Malaysia, 43600 UKM Bangi, Malaysia.

<sup>b</sup>Dept. of Materials Science and Metallurgy, University of Cambridge, 27 Charles Babbage Road, Cambridge CB3 0FS, UK.

<sup>c</sup>Materials Science and Engineering, Rutgers University, 607 Taylor Road, Piscataway, New Jersey 08854, USA.

<sup>d</sup>Dept. of Chemistry and Dept. of Energy Engineering, Low-Dimensional Carbon Materials Center, Ulsan National Institute of Science and Technology (UNIST), UNIST-gil 50, Ulsan 44919, Rep. of Korea.

<sup>e</sup>UNIST Central Research Facilities (UCRF) & School of Materials Science & Engineering, UNIST, Ulsan 689-798, Rep. of Korea

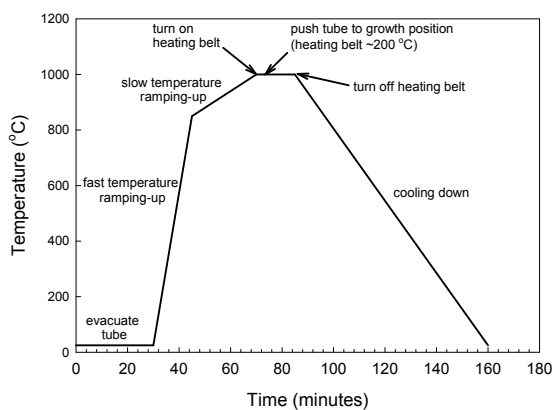

Figure S1. Furnace temperature profile versus time

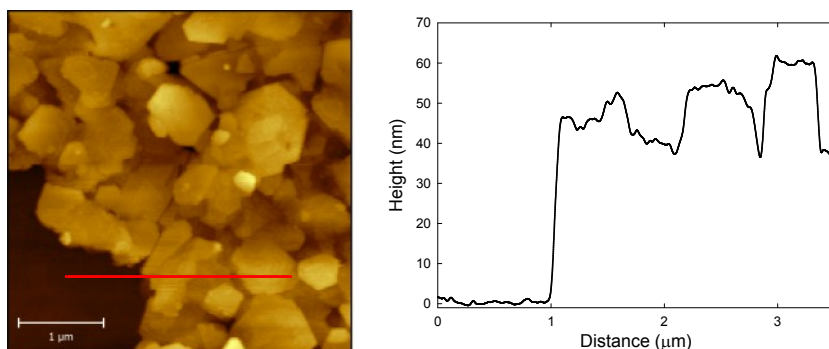

Figure S2. Cross-sectional AFM image showing the thickness of the Nb<sub>1.3</sub>S<sub>2</sub> film is ~50 nm (red line)
